# Supplementary material
Source: publisher figshare collection journal article supplement (https://tandf.figshare.com/ndownloader/files/22665134)
Supplement: Supplementary file 1 [file 22665134]

***Supplementary Materials***

**Multi-component preparation of quinazolinone derivatives in the presence of TiO2 nanoparticles supported ionic liquids**

Raziyeh Bakhshali-Dehkordi a, Mohammad Ali Ghasemzadeh,a, Javad Safaei‐Ghomi b

*a Department of Chemistry, Qom Branch, Islamic Azad University, Qom, Iran*

*b Department of Organic Chemistry, Faculty of Chemistry, University of Kashan, Kashan Iran.*

*Email: ghasemzadeh@qom‐iau.ac.ir*

**Spectral data of the new compounds:**


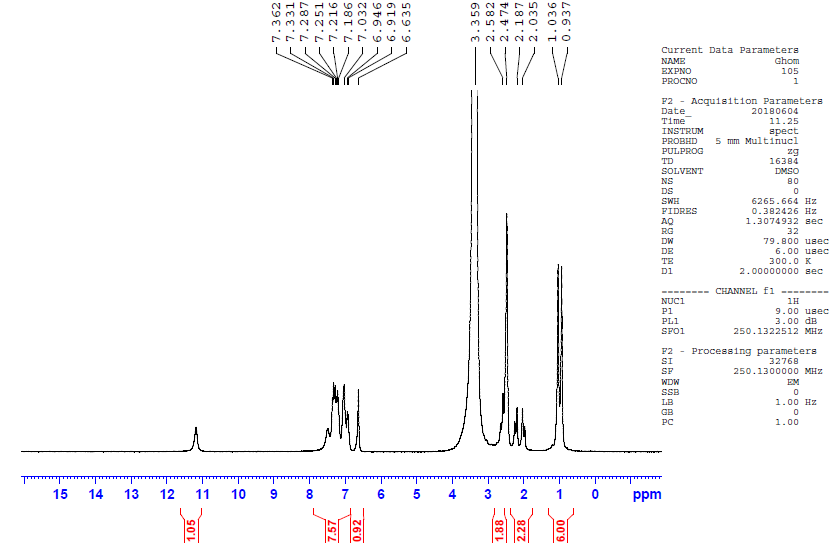


**Fig. S1.** 1H-NMR spectrum of 3,3-dimethyl-12-(2-chloro phenyl)- 1,2,3,4,5,12-hexahydro [4, 5] imidazo [2,1-d] quinazolin-1-one (5b)


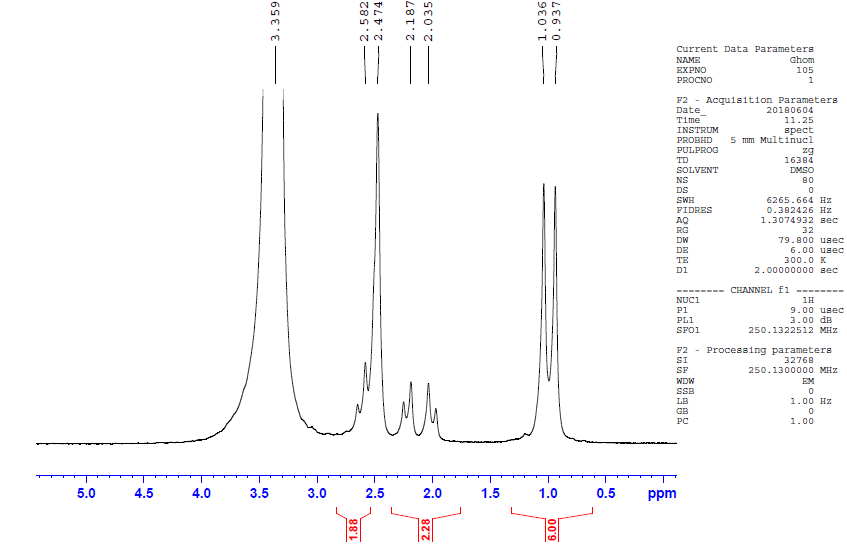


**Fig. S2.** The expanded 1H-NMR spectrum of 3,3-dimethyl-12-(2-chloro phenyl)- 1,2,3,4,5,12-hexahydro [4, 5] imidazo [2,1-d] quinazolin-1-one (5b)


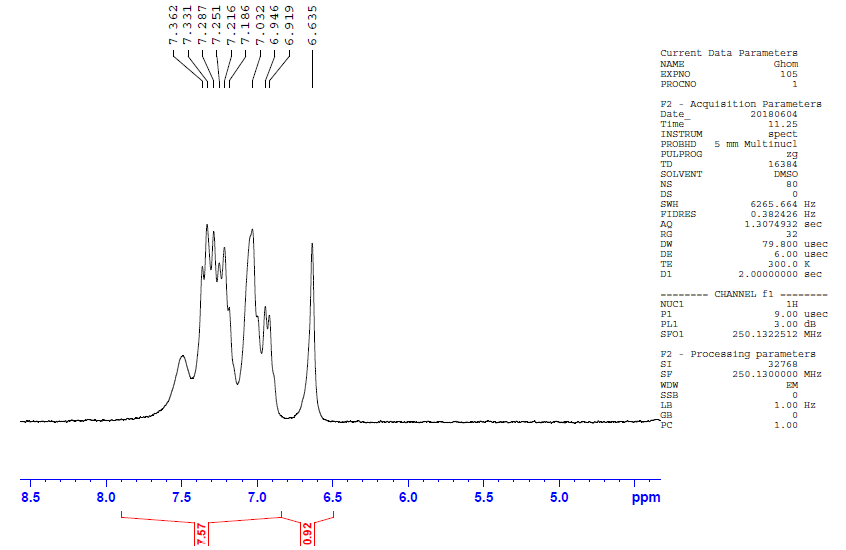


**Fig. S3.** The expanded 1H-NMR spectrum of 3,3-dimethyl-12-(2-chloro phenyl)- 1,2,3,4,5,12-hexahydro [4, 5] imidazo [2,1-d] quinazolin-1-one (5b)


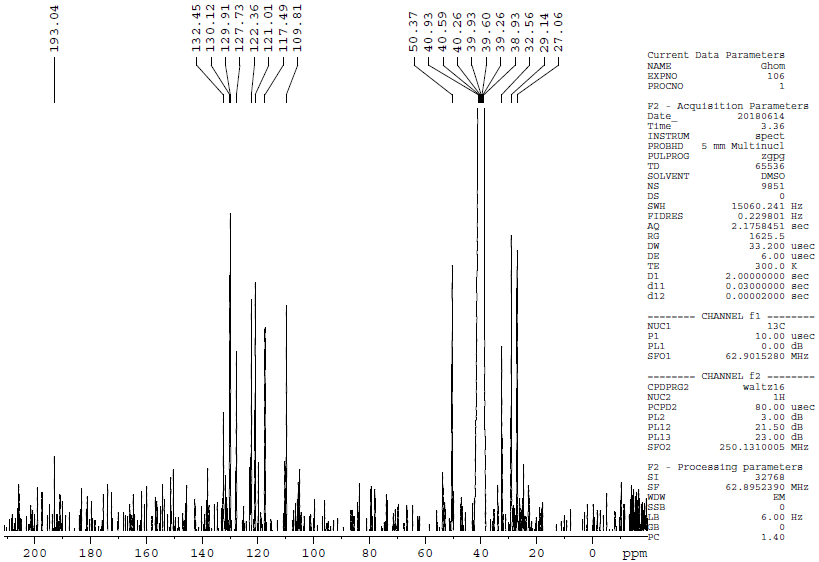


**Fig. S4.** 13C-NMR spectrum of 3,3-dimethyl-12-(2-chlorophenyl)- 1,2,3,4,5,12-hexahydrobenzo [4,5] imidazo [2,1-b] quinazolin-1-one (5b)


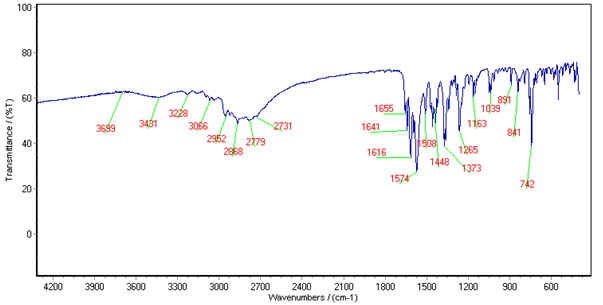


**Fig. S5.** FT-IR spectrum of 3,3-dimethyl-12-(2-chloro phenyl)- 1,2,3,4,5,12-hexahydro [4, 5] imidazo [2,1d] quinazolin-1-one (5b)


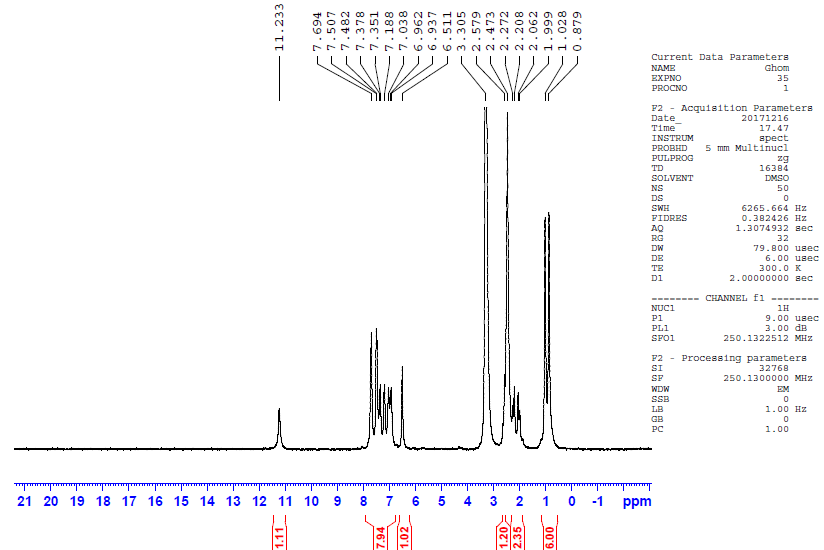


**Fig. S6.** 1H-NMR spectrum of 3,3-dimethyl-12-(4-cyano phenyl)- 1,2,3,4,5,12-hexahydro [4, 5] imidazo [2,1-d] quinazolin-1-one (5f)


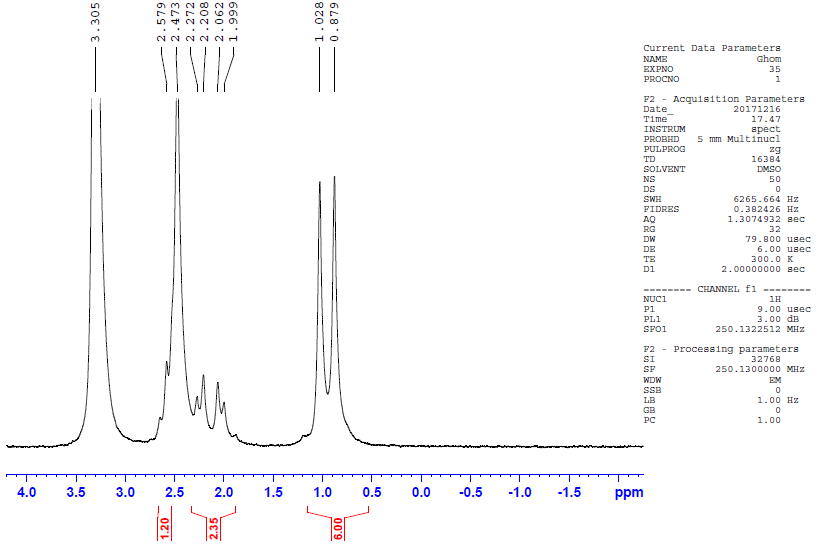


**Fig. S7.** The expanded 1H-NMR spectrum of 3,3-dimethyl-12-(4-cyano phenyl)- 1,2,3,4,5,12-hexahydro [4, 5] imidazo [2,1-d] quinazolin-1-one (5f)


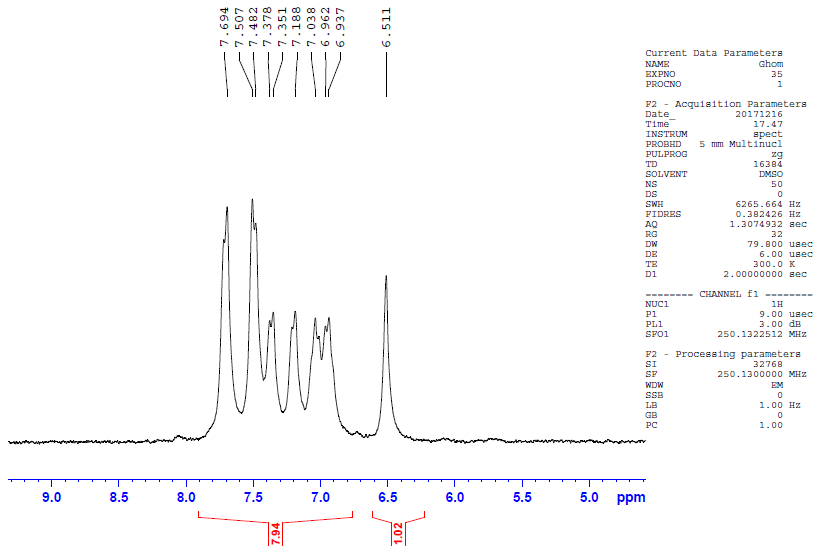


**Fig. S8.** The expanded 1H-NMR spectrum of 3,3-dimethyl-12-(4-cyano phenyl)- 1,2,3,4,5,12-hexahydro [4, 5] imidazo [2,1-d] quinazolin-1-one (5f)


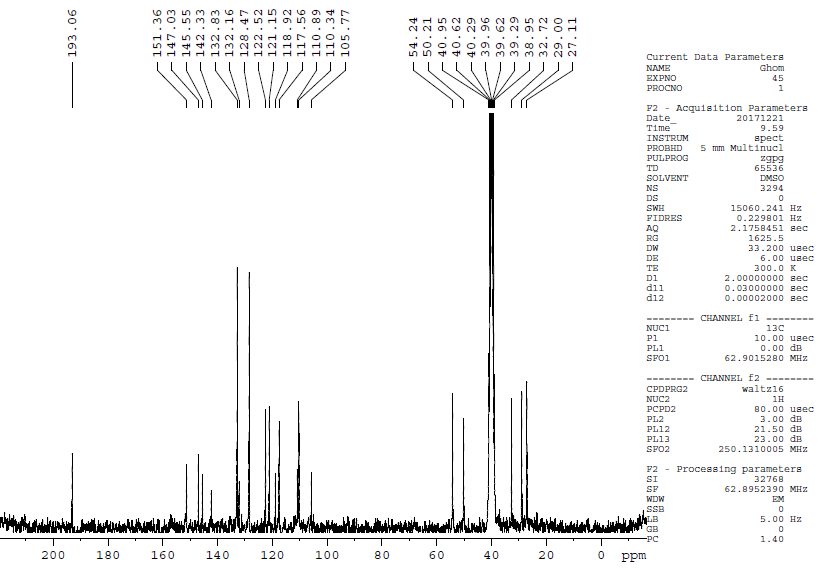


**Fig. S9.** 13C-NMR spectrum of 3,3-dimethyl-12-(4-cyano phenyl)- 1,2,3,4,5,12-hexahydrobenzo [4,5] imidazo [2,1-b] quinazolin-1-one (5f)


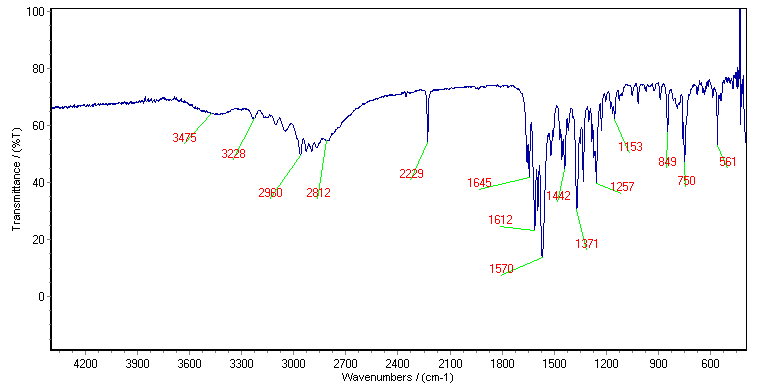


**Fig. S10.** FT-IR spectrum of 3,3-dimethyl-12-(4-cyano phenyl)- 1,2,3,4,5,12-hexahydro [4, 5] imidazo [2,1d] quinazolin-1-one (5f)


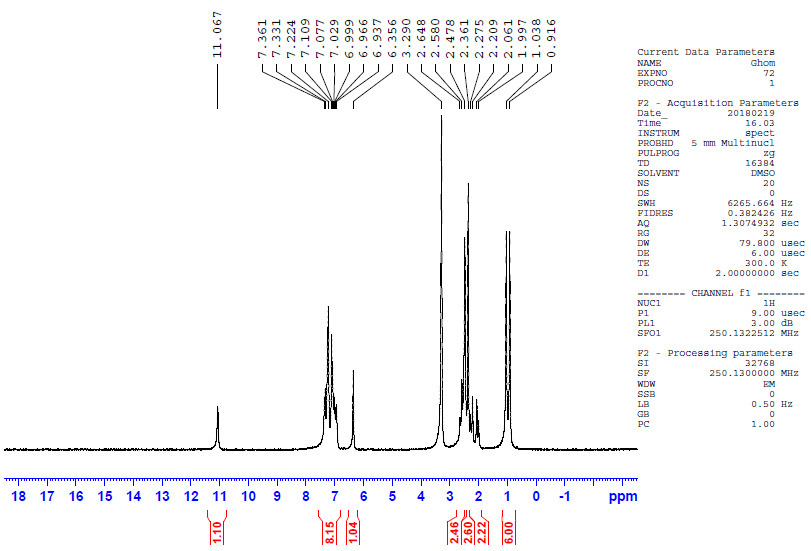


**Fig. S11.** 1H-NMR spectrum of 3,3-dimethyl-12-(4-methyl thio phenyl)- 1,2,3,4,5,12-hexahydrobenzo [4,5] imidazo [2,1-d] quinazolin-1-one (5i)


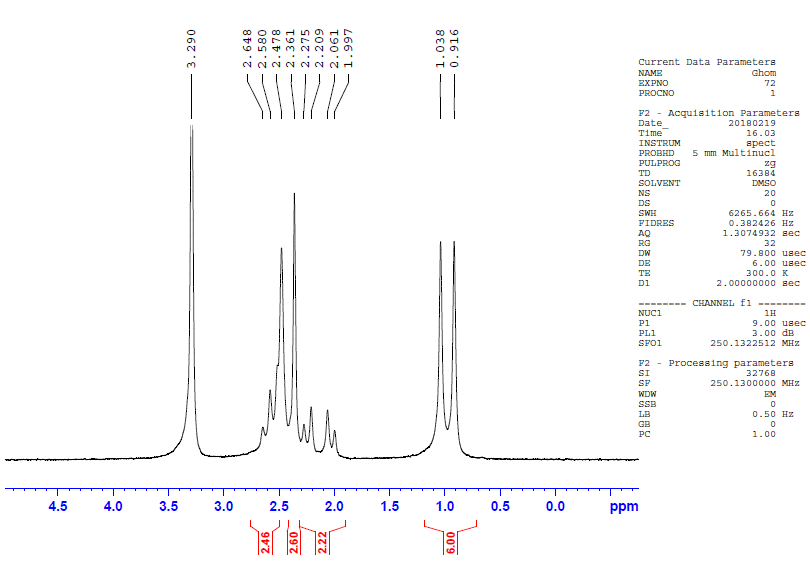


**Fig. S12.** The expanded 1H-NMR spectrum of 3,3-Dimethyl-12-(4-methyl thio phenyl)- 1,2,3,4,5,12-hexahydrobenzo [4,5] imidazo [2,1-d] quinazolin-1-one (5i)


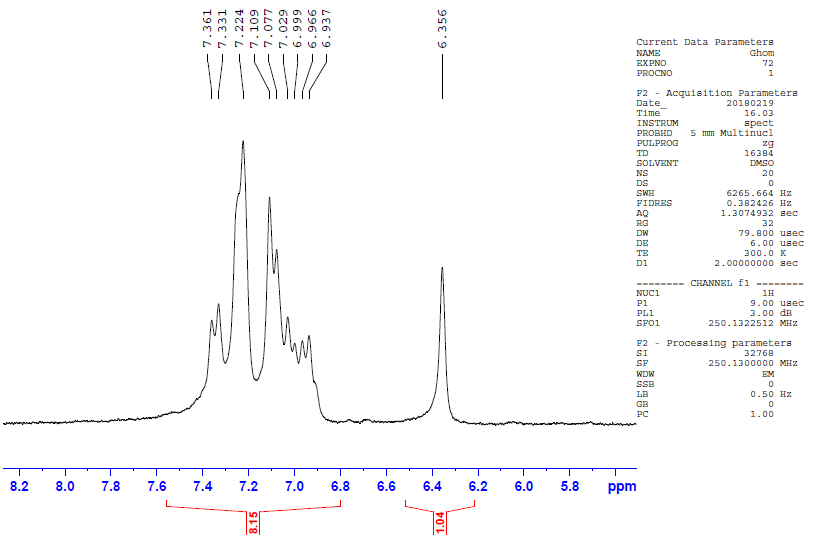


**Fig. S13.** The expanded 1H-NMR spectrum of 3,3-dimethyl-12-(4-methyl thio phenyl)- 1,2,3,4,5,12-hexahydrobenzo [4,5] imidazo [2,1-d] quinazolin-1-one (5i)


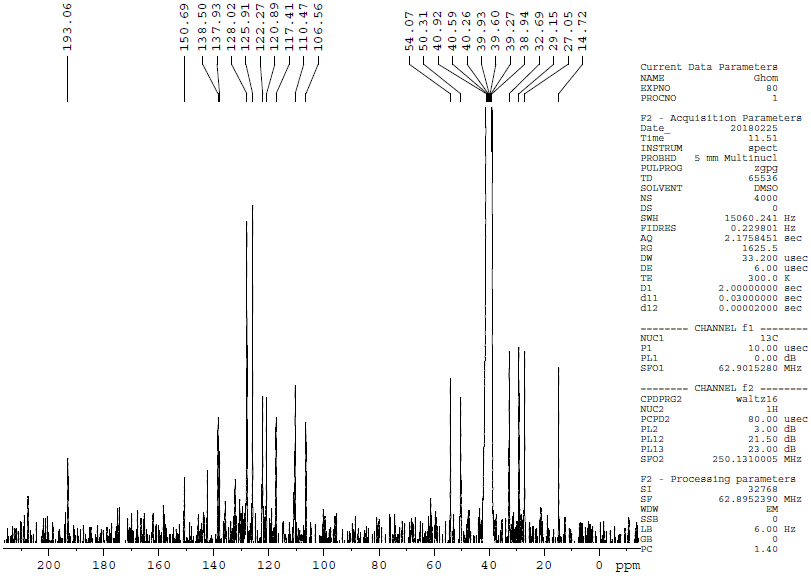


**Fig. S14.** 13C-NMR spectrum of 3,3-dimethyl-12-(4-methylthio phenyl)- 1,2,3,4,5,12-hexahydrobenzo [4,5] imidazo [2,1-d] quinazolin-1-one (5i)


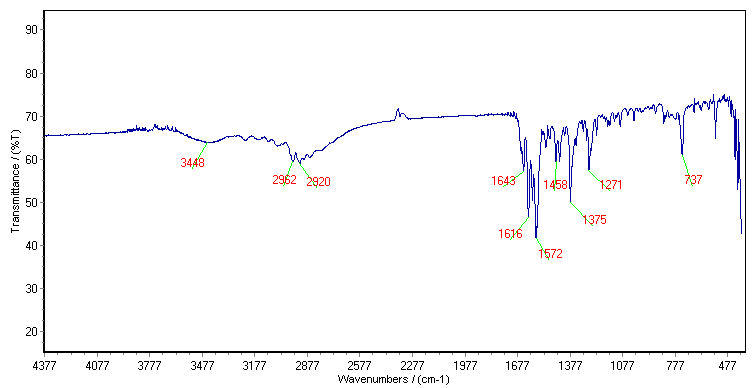


**Fig. S15.** FT-IR spectrum of 3,3-dimethyl-12-(4-methylthio phenyl)- 1,2,3,4,5,12-hexahydrobenzo [4,5] imidazo [2,1-d] quinazolin-1-one (5i)


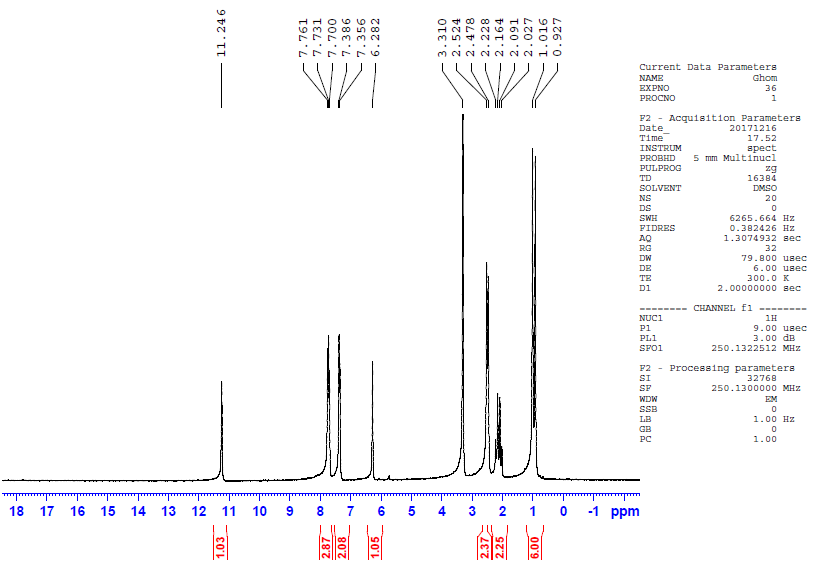


**Fig. S16.** 1H-NMR spectrum of 6,6-dimethyl-9(4-cyano phenyl)-5,6,7,9-tetrahydro-4H-1,2,4-triazolo[5,1- *b*] quinazolin-8-one (6e)


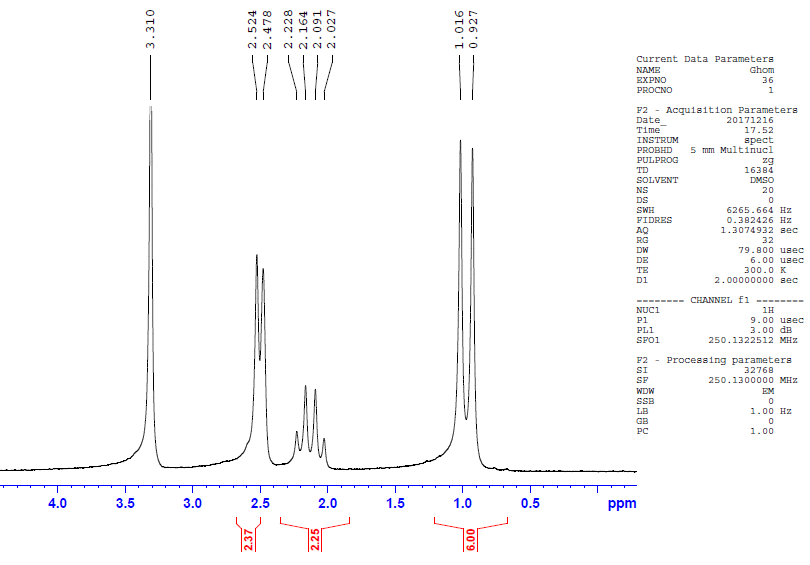


**Fig. S17.** The expanded 1H-NMR spectrum of 6,6-dimethyl-9(4-cyano phenyl)-5,6,7,9-tetrahydro-4H-1,2,4-triazolo[5,1- *b*] quinazolin-8-one (6e)


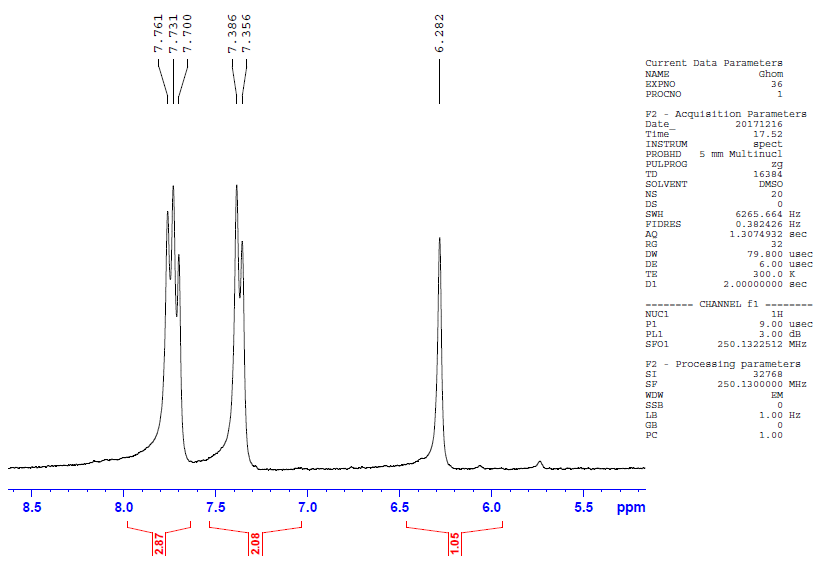


**Fig. S18.** The expanded 1H-NMR spectrum of 6,6-Dimethyl-9(4-cyano phenyl)-5,6,7,9-tetrahydro-4H-1,2,4-triazolo[5,1- *b*] quinazolin-8-one (6e)


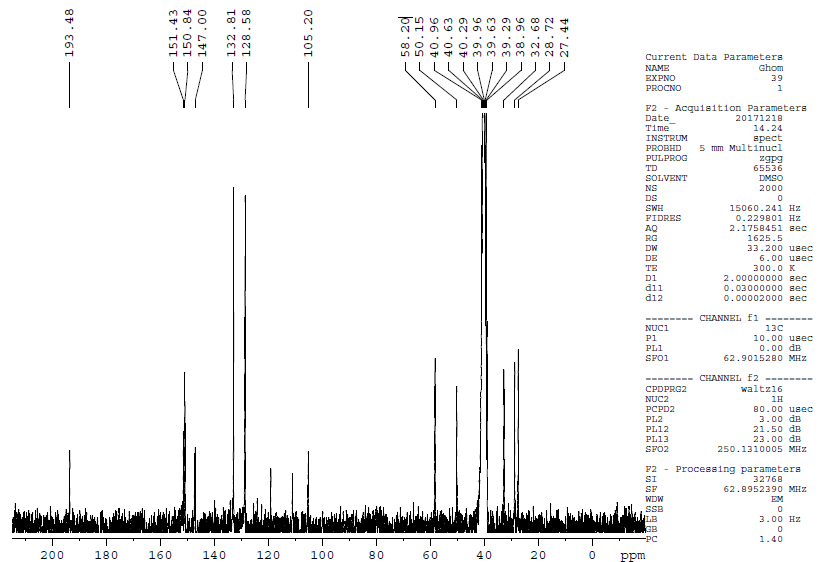


**Fig. S19.**13C-NMR spectrum of 6,6-dimethyl-9(4-cyano phenyl)-5,6,7,9-tetrahydro-4H-1,2,4-triazolo[5,1- *b*] quinazolin-8-one (6e)


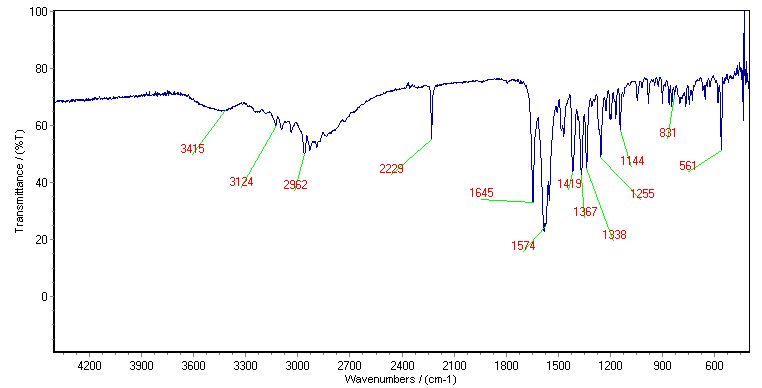


**Fig. S20.** FT-IR spectrum of 6,6-dimethyl-9(4-cyano phenyl)-5,6,7,9-tetrahydro-4H-1,2,4-triazolo[5,1- *b*] quinazolin-8-one (6e)
